# Supplementary material
Source: publisher figshare collection journal article supplement (https://frontiersin.figshare.com/ndownloader/files/16603178)
Supplement: Supplementary file 1 [file 16603178]

## Sheet: Sheet1
Day	Treatment	Replicate	Symbiodinium cells x10^2 (ug-1 total protein)	Chla (pg/symbiodinium cell)
1	1	1	2.94798	1.33963
1	1	2	2.01253	1.96896
1	1	3	3.11811	2.37618
1	1	4	1.93529	1.33292
1	2	1	3.00065	2.02099
1	2	2	2.17223	2.00369
1	2	3	2.80289	1.11107
1	2	4	2.81231	1.97285
1	3	1	1.06391	2.31702
1	3	2	2.1047	2.25366
1	3	3	3.40888	1.31577
1	3	4	4.09018	1.56415
1	4	1	2.63368	2.01901
1	4	2	2.47438	1.62025
1	4	3	1.8869	2.61506
1	4	4	3.45895	2.19492
1	5	1	3.8166	1.42114
1	5	2	2.51135	2.20706
1	5	3	2.61681	1.53372
1	5	4	2.90967	2.79745
13	1	1	2.79164	1.85849
13	1	2	2.18811	1.00407
13	1	3	1.78089	1.77121
13	2	1	4.48699	1.43516
13	2	2	2.60145	2.42087
13	2	3	2.17597	1.60789
13	3	1	3.30219	1.65519
13	3	2	2.10205	1.20161
13	3	3	1.5337	1.33155
13	4	1	2.09523	2.14237
13	4	2	3.24691	1.79138
13	4	3	3.19312	1.4293
13	5	1	2.64548	1.73165
13	5	2	3.10008	1.72449
13	5	3	2.84738	2.53399
End	1	1	0.823678	0.824427
End	1	2	0.596129	1.67551
End	1	3	0.703626	0.860363
End	2	1	0.224344	1.64631
End	2	2	0.604686	0.70708
End	2	3	1.19979	0.586012
End	3	1	0.213759	1.21644
End	3	2	0.0939135	1.47539
End	3	3	0.489047	0.623312
End	3	4	0.320052	1.17964
End	4	1	0.31425	1.05207
End	4	2	0.91485	0.605233
End	4	3	1.1146	0.895387
End	4	4	2.10639	0.728684
End	5	1	3.91417	2.2484
End	5	2	5.91316	1.72106
End	5	3	1.43888	3.58353
End	5	4	3.85988	1.60543
